# Supplementary material for: Development and application of 14 microsatellite markers in the burying beetle Nicrophorus vespilloides reveals population genetic differentiation at local spatial scales
Source: PeerJ. 2017 May 2;5:e3278. doi: 10.7717/peerj.3278 (PMC5417058; doi:10.7717/peerj.3278)
Supplement: Data S1 [file peerj-05-3278-s001.xlsx]

## Sheet: All_markers
	Mix1										Mix2												Mix3
Sample	Nvesp_A	Nvesp_A	Nvesp_D	Nvesp_D	Nvesp_J	Nvesp_J	Nvesp_M	Nvesp_M	Nvesp_Q	Nvesp_Q	Nvesp_B	Nvesp_B	Nvesp_F	Nvesp_F	Nvesp_I	Nvesp_I	Nvesp_P	Nvesp_P	Nvesp_E	Nvesp_E	Nvesp_G	Nvesp_G	Nvesp_H	Nvesp_H	Nvesp_K	Nvesp_K	Nvesp_O	Nvesp_O
Wm1	149.39	154.9	210.79	210.79	308	312	372.95	378.75	487.48	490	170	178.35	228.08	228.08	310.17	310.17	417	419.97	213.12	217.09	283.26	285.24	294	300.27	345	345	409.21	409.21
Wm2	151.89	154.88	208.06	217	304.18	308.36	374.88	380.65	490	493	172.44	178.32	233.79	237.52	312.35	312.35	417	419.94	207	209.37	275.27	275	299.57	302.29	344.65	344.65	400	409.33
Wm3	158.31	158.31	213.55	217	304.01	304.01	374.96	374.96	490.31	490.31	172.45	172.45	228.02	233.63	307.94	312.12	417.04	417.04	211	217	283.25	283.25	298.29	302	339.36	344.55	392.95	406
Wm4	145.67	151.96	202.34	205.2	304.18	308.36	373.01	373.01	490	490	172	172	231.89	240	310.1	310.1	411	420.09	205.39	211.13	275.21	281.19	294	294	344.73	344.73	403	403
Wm5	146.27	154.99	217	217	304	308	372.93	380.58	490	490	172.44	172.44	226.16	238	310	310	410.98	417.21	215	215	277.15	281.18	292	296	345.49	345.49	399.83	402.93
Wm6	145.6	151.95	205.18	208.11	304.25	304.25	375.01	378.75	490	490	170	172	231.89	233.7	308.02	310.07	411	414	213	213	281.24	281.24	302	308.31	344.52	344.52	403	403
Wm7	154.98	160.8	205.13	213.52	304.14	308.37	378.77	380.6	490	490	172	172	231.88	237.51	310.03	310.03	399	413.9	202.7	211	0	0	302	302	344.56	344.56	389.78	403.05
Wm8	146.2	163.57	210.73	210.73	308.47	312	373.11	380.66	496	499	174	178.26	228.07	233.68	310.14	312.23	411	411	217	217	0	0	300	300	345	345	403.06	403.06
Wm9	140	154.9	202.32	213.55	299.91	308.39	373.02	380.56	490	499	170.4	170.4	231.84	233.74	310.07	310.07	411	417	205.33	209.28	277.08	281.19	294	296	345.26	345.26	403.08	406
Wm10	146.13	154.89	199	202.23	304.24	304.24	380.58	380.58	489.72	489.72	172.35	178.17	231.78	233.71	310	310	420.08	420.08	213	217	281.15	281.15	292.36	296	345.44	345.44	406.08	406.08
Wm11	152	155.03	199	208	303.86	316.39	372.92	374.87	490.31	490.31	168.44	172.33	233.76	239.55	310.09	310.09	417.19	417.19	211	213	273.22	273	300	300	344.63	344.63	393.09	406
Wm12	0	0	0	0	0	0	0	0	0	0	170.41	176.26	226.15	240	310.1	310.1	410.9	414.08	209.47	218.84	279.16	281.15	296.2	300	344.58	344.58	403.04	406.17
Wm13	145.76	154.93	205.13	208.09	0	0	372.89	378.55	490	493	170.48	172.37	233.67	244	308.03	312.17	417	417	217.03	217.03	277.14	283.11	294	300	345	345	403.04	403.04
Wm14	154.8	154.8	202.36	213.57	312	312	374.84	380.51	490.4	493	170	170	231.9	233.72	310.06	310.06	411	423.17	217	219	277.14	279.13	292.3	300	344.65	344.65	400	403.05
Wm15	149	154.98	204.99	204.99	304	312.28	374.92	378.75	487.48	487.48	168	172.31	231.91	244	310.14	310.14	411	417	206.59	217	0	0	0	0	345	345	0	0
Wm16	149.4	154.93	210.69	213.54	304	308	375.06	376.97	487	490	168	172	226.2	233.75	310.16	310.16	414	417	207	209.4	281.15	285.14	296.44	296.44	344.6	344.6	402.98	406
Wm17	145.63	154.94	202.32	213.54	304.27	304.27	375.06	378.83	490	493	170	172	227.97	231.79	310.11	310.11	414	420.29	213.05	213.05	277.12	279	300	300	344.6	344.6	403.09	406.26
Wm18	154.85	154.85	213.54	217	304	308	372.97	380.6	487.45	496	170.41	172.3	226.11	231.81	309.94	312.1	411	420.38	207	211.39	277.07	281	290.49	296	344.74	344.74	390	406.08
Wm19	151.97	160.73	207.89	210.78	303.89	303.89	380.73	380.73	490	490	172.25	172.25	233.68	233.68	307.98	312.13	414	417	211	211	0	0	296.25	298	344.6	348	389.76	399.92
Wm20	149	152.07	202.19	210.66	303.79	308.02	373	378.79	490	496	170.36	172	231.85	233.69	307.89	314	414	426	209.43	217.11	281.23	281.23	296.35	296.35	342.46	344.56	402.96	409.26
Wf21	145.73	154.94	210.62	217	303.88	308.03	378.67	380.63	446.84	490	170.38	170.38	233.68	238	309.96	309.96	411.03	414	209.43	211.27	277.1	279.19	300	302.25	345.41	345.41	403.14	406.37
Wf22	154.98	164.19	213.57	213.57	304.06	312.42	371.12	375.04	487	490.42	170	197.79	233.97	233.97	310.2	310.2	411	411	211	211	0	0	294	298	342	345	389.67	406.21
Wf23	139.72	179	205.05	217	308	312	374.88	374.88	484.33	496	172	182.09	228.01	233.7	309.91	309.91	411	420.15	211.35	211.35	277.14	281.11	298.1	302.23	344.5	348	403	406
Wf24	154.89	154.89	213.63	213.63	304.11	308	380.61	380.61	490	490	168	174	226.22	233.74	310.08	310.08	417.08	420.06	207	209	277.16	279.23	290	296	344.66	344.66	406	409
Wf25	149.39	149.39	202.36	208.11	308.35	324	375.1	384.54	490	496	170.44	176.12	233.6	235.62	310.14	312.21	408	411	207	211	283.1	285.08	292.28	296	344.71	344.71	402.93	402.93
Wf26	154.93	154.93	213.58	213.58	308.44	308.44	375.07	382.67	490	496	172.35	174	231.85	231.85	310.02	310.02	410.98	414.17	209.44	216.96	281.13	283.13	291.65	296	339.25	345	403.05	409.25
Wf27	146.27	154.93	202.43	210.76	304.17	304.17	380.67	380.67	490.4	490.4	170.35	178.22	231.85	233.7	310	312.11	414	423.34	211.38	213.04	277.19	279.2	294	296.35	345.34	345.34	402.87	406.1
Wf28	149.49	163.66	210.6	210.6	304	312	373.1	389	489.64	496	172.34	174	233.7	233.7	307.95	312.15	420.18	420.18	211.27	217.08	277.19	285.09	296.32	302.26	344.59	344.59	403.07	403.07
Wf29	149	155.03	208.07	223	303.79	308.12	374.92	376.8	490	496	170.41	172.32	233.68	240	307.93	310.02	414	414	216.99	216.99	281.24	281	296.34	302.25	344.53	344.53	396.01	403.06
Wf30	146.34	154.94	205.18	210.7	308	308	380.64	380.64	446.84	490	176.23	178.13	231.82	231.82	307.93	312.11	411	416.97	211.25	217.04	277.17	281	294.32	300	344.52	344.52	403.07	403.07
Wf31	0	0	0	0	0	0	0	0	0	0	170.4	170.4	228.07	231.94	310.06	310.06	414	416.96	207	213	0	0	292.43	296	345	345	389.69	403.11
Wf32	148.8	151.87	202.35	210.62	304.21	308.33	373.17	380.75	490	490	170.46	172.33	226.09	233.63	308.29	310.08	411	414	205	216.84	275.08	279.1	294	296.49	344.62	344.62	403.08	403.08
Wf33	146.2	151.96	217	217	304.23	304.23	378.82	389	490.49	490.49	170.42	170.42	233.73	237.52	310.1	310.1	410.9	423.3	211	211	0	0	292	296	345	348	403	412
Wf34	154.93	158.3	205.08	210.68	304	320	375.05	376.93	487	490	170.49	170.49	226.27	231.91	307.98	310.06	411.02	420.26	209.36	215.22	279.31	279.31	296.35	300.18	342.35	345.34	403.05	409
Wf35	154.89	154.89	205.13	205.13	304.17	308	373.07	380.66	487	496	170	172	228	238	310.05	312.04	411	417.26	211.23	213.16	283.13	285.05	296	296	344.6	344.6	389.55	406.25
Wf36	149.39	154.98	210.7	213.5	312.28	316.43	378.64	378.64	446.75	496	174	178.19	228.02	231.73	309.91	309.91	414.03	417.15	209.36	209.36	273.1	283.14	290.04	294	344.7	344.7	399.92	409.29
Wf37	146.24	151.99	208.09	217	303.99	324	382.6	385	490	490	170.43	170.43	233.68	233.68	310.04	310.04	411	414	207	211.28	281.12	281.12	294	310	345	345	406	409
Wf38	0	0	0	0	0	0	0	0	0	0	168	172.27	230	231.87	310.04	310.04	417	423.49	211	211	0	0	292.39	300	344.59	344.59	403.03	406.33
Wf39	152.07	154.94	202.37	213.62	299.91	308.27	374.99	389	490	490	170.47	172.37	238	240	310.1	310.1	411	414	213	219	275.18	277.1	296	300.36	339	345	406	409
Wf40	154.79	154.79	202.29	213.56	303.95	303.95	372.98	382.56	490	490	172.3	172.3	228.06	238	308.04	310.12	411	423.05	211.2	216.76	281.11	281	294	296.19	344.64	344.64	406	409
Gm41	149	154.98	207.92	207.92	308	308	375	378.8	490	490	170.32	170.32	233.72	233.72	310.06	310.06	411	414	209	209	281.11	285.1	289.52	296	339.27	345.43	402.95	402.95
Gm42	146.13	154.89	210.75	210.75	308.36	316	373.1	383	490	496	170.39	172.2	231.82	231.82	310.08	312.16	417	423.19	217	217	279.18	279.18	298.45	302	345	345	403	403
Gm43	0	0	0	0	0	0	0	0	0	0	170.38	172.28	226.15	233.74	306	312.05	411	423.19	217	217	273.27	283.16	294	302	345.39	345.39	403.11	403.11
Gm44	154.88	154.88	210.69	210.69	308.18	308.18	374.93	380.68	446.78	496	170.4	170.4	226.13	233.8	310.07	312.07	414.16	423.24	207	215.24	0	0	291.73	296.26	344.62	344.62	403.05	412
Gm45	149.39	151.88	210.67	210.67	304.28	304.28	373.08	382.56	489.54	496	170.31	170.31	226.12	227.99	309.71	309.71	423.18	423.18	211.29	217.02	279.26	281.2	292	302	345.47	345.47	403.08	403.08
Gm46	149.39	154.98	210.63	217	303.81	308.15	378.81	380.7	490	490	168.42	172.16	229.85	240	307.67	307.67	411	423	213.17	216.95	281.19	283.12	285.65	294	345.39	345.39	402.99	421
Gm47	155.03	160.73	210.69	217	303.97	312.45	374.96	378.79	490	490	172.3	178.19	227.99	233.64	312.18	312.18	411	426	211	211	277.26	279.3	302	302	339.36	344.51	402.99	412.44
Gm48	145.62	154.89	217	217	300.09	304	371.23	371.23	487	496	168.45	170	226.16	231.86	306	310.2	411	411	217	217	283.22	285.18	302	302	345.45	345.45	402.97	402.97
Gm49	0	0	0	0	0	0	0	0	0	0	172.25	172.25	231.92	231.92	310.03	312.28	411	420.04	0	0	0	0	0	0	0	0	0	0
Gm50	131	154.88	205.15	213.52	304.01	308.29	371.25	378.88	487.49	496	170.43	178	231.82	233.66	310.03	310.03	414	420.01	213	213	277.21	281.2	302	302	345.36	345.36	403.03	409.2
Gm51	151.96	154.9	205.18	205.18	300	308.42	374.98	376.86	490	490	168.39	170.39	229.9	233.7	310.06	310.06	411	414	209.48	213.34	285.17	285.17	294	300.27	348	348	399.92	406.2
Gm52	152.07	154.94	213.59	213.59	304.05	308.27	378.89	378.89	490	496	172.21	172.21	233.6	233.6	304	309.98	414	420	216.98	216.98	281.09	283.09	296.25	302.34	339.32	344.54	403	403
Gm53	152.44	157.85	213.5	213.5	308	316	380.62	380.62	490	490	164	172.43	231.8	238	307.98	314.22	417	417	217	217	283.19	285.27	300	300	345.36	345.36	403.04	403.04
Gm54	0	0	0	0	0	0	0	0	0	0	170.49	172.3	231.76	240	310.01	312.09	399	414.06	211.28	215.21	281.1	285.02	294	296	345	345	406.19	409.42
Gm55	151.98	154.85	202.27	202.27	304.21	308.41	373.1	382.63	0	0	170	182	228.04	228.04	304	310.09	408	420.02	217	217	277.13	281.07	294.26	300	344.53	344.53	403.01	406.1
Gm56	148.89	154.94	214	217	308.14	308.14	380.64	383	490	490	168	172	232.09	233.94	308.19	310.34	420	423.29	207	217	281.17	283.21	292.42	292.42	344.67	344.67	403.07	403.07
Gm57	148.88	151.9	199.47	210.72	304.05	308.28	378.8	380.67	490	490	170	172.39	233.74	240	310.06	312.21	411	420	207.38	215.02	273.14	279.27	298.36	298.36	339.34	344.67	403.03	409.18
Gm58	140	151.98	214	214	308	312	380.67	386.58	490	496	176.26	181.94	227.99	231.7	310.04	310.04	414.08	414.08	0	0	281.18	287.17	292.37	292.37	345.36	345.36	406	406
Gm59	151.88	154.94	205.34	213.66	0	0	0	0	490	490	170.38	172.47	231.79	238	309.95	309.95	414	420	207	217.04	281.21	283.21	296	302.33	345	348	403.04	406.27
Gm60	145.76	160.64	0	0	299.82	308.28	371.41	375.2	0	0	170.28	172.2	233.7	240	309.96	309.96	414	423.22	211	217	268.79	275	292.29	300	345	345	389.71	406
Gf61	149.4	154.88	207.96	217	308	308	375.07	378.85	490	490	170.32	170.32	231.79	233.65	310.07	310.07	407.85	414.16	207	213.13	0	0	294	296.25	345.41	345.41	389.75	403.14
Gf62	154.93	178.69	210.79	210.79	304.1	316	373.07	382.59	490	490	170.28	172.27	227.99	233.73	310.05	312.13	407.94	414	213.29	213.29	279.19	283.19	294	300.18	339.23	345	403.15	409
Gf63	154.94	154.94	205.19	205.19	304	308.33	378.85	378.85	490	490	170.34	172.41	226.11	231.82	310.03	310.03	408	411	205	211.3	279.14	281.13	294	300	344.57	354	406	406
Gf64	148.89	154.94	210.77	213.57	303.87	308	371.14	374.94	490	490	170.45	170.45	226.13	233.7	310.13	310.13	414	417	203	216.83	281.17	283.24	294	302.3	344.54	344.54	402.92	406
Gf65	154.98	154.98	210.76	210.76	304.07	316	373.14	374.93	490	496	170	172.44	231.83	233.65	310.05	310.05	407.76	411	213.17	216.95	281.16	281.16	294.35	300	345.42	345.42	400	406.19
Gf66	146.13	154.93	213.59	213.59	304.17	308.33	371.23	380.77	447	496	170	172	234.11	236.02	310.27	310.27	420	420	213	219	279.14	283.18	298	304.34	345.49	345.49	406	409.2
Gf67	140	160.64	207.97	207.97	304.13	304.13	373.12	378.87	447	489.62	172.35	172.35	228.18	233.75	307.99	312	414	417	211	217	279.1	281.11	291.72	302.25	345	345	403	409.37
Gf68	154.94	154.94	205.1	213.53	303.8	307.95	375.01	386.67	490	496	170.29	172.2	227.95	233.61	307.94	307.94	414.2	420.17	211.21	216.82	279.24	281.24	294	294	345	345	399.92	406
Gf69	145.55	157.8	205.16	205.16	300.09	308	373.11	380.7	469	490.41	174.44	174.44	231.76	231.76	307.94	310.04	411.02	411.02	213.15	225	283.15	283	294	300	342	345	396.09	406
Gf70	152.07	178.65	210.69	213.5	304	308.08	373.04	382.57	490	490	170.05	174	227.97	233.63	310	310	414.06	423.14	211.28	217.05	279.18	281.1	294	302.33	344.64	344.64	406	406
Gf71	145.58	154.93	213.58	217	308.3	308.3	376.93	380.75	0	0	174	176.33	237.55	240	310.02	310.02	413.52	413.52	211	213	277.21	279.26	300	300	339.26	345	402.99	402.99
Gf72	149.4	151.89	210.74	213.54	304.12	304.12	0	0	490	490	171.57	178	234.06	237.82	310.25	310.25	408	426.02	209	217	268.76	268.76	298.3	298.3	345.37	345.37	389.54	390
Gf73	154.89	154.89	207.97	207.97	304	312	375.03	376.97	490	490	170	176.27	231.9	233.73	310.1	310.1	423.08	423.08	211.12	220.68	277.14	277.14	294	296.31	345.4	345.4	406	412
Gf74	148.78	148.78	210.69	213.5	308	324	376.96	380.68	490	490	170.35	172.44	229.99	240	308	310.02	417	417	211.17	213.08	281.15	285.15	292.36	292.36	345.36	345.36	399.92	406
Gf75	154.84	154.84	205.11	210.74	304	304	378.96	380.93	0	0	172.35	172.35	231.82	233.66	310.11	312.19	417	417	0	0	0	0	294.37	294.37	342	345	400	421
Gf76	152.01	158.36	217	217	308.4	316	375.11	375.11	0	0	174	181.93	233.67	233.67	310.07	312.15	417.24	419.98	209.45	213.12	279.11	285.11	294	302	344.55	344.55	400	406
Gf77	151.99	160.73	205.18	210.8	303.87	303.87	382.6	382.6	490	490	172.32	172.32	231.82	233.75	310.03	310.03	417.15	423.16	211	217	283.18	291.13	294.17	300	342	342	406.36	409.42
Gf78	152.49	152.49	214	214	308.36	308.36	373.16	380.79	490	490	168	170.34	237.51	237.51	308	308	417	417	207	211	281.14	287	294	296	339.29	344.56	406.17	412
Gf79	148.88	154.89	205.02	214	304.2	304.2	378.8	380.69	490	490	170.41	176.18	231.76	233.69	308.29	310	420.08	420.08	0	0	0	0	0	0	0	0	0	0
Gf80	146.17	151.97	210.67	217	304.27	308	371.26	375.01	490	490	170.48	170.48	231.83	231.83	310.11	314	407.77	407.77	211	211	281.07	281.07	292.23	296	344.62	344.62	403.05	409.34
BPm81	139.51	154.84	210.73	210.73	308.33	316	380.68	382.6	490	490	168	170	229.93	238	305.84	310.08	408	414.05	209.15	209.15	285.18	287.14	296.25	300.26	344.5	344.5	400	406
BPm82	154.93	154.93	217	217	308.36	308.36	373.09	382.54	487	487	172.44	172.44	231.76	235.57	307.93	310.07	408	411	209.12	215.06	283.1	285.16	294	302	339	345	403	403
BPm83	149.4	154.89	204.93	208	0	0	374.67	379	490	490	170.35	172.42	231.81	231.81	307.96	312.15	411	417	211.05	217.35	279.11	281	296	296	344.54	344.54	403.01	406
BPm84	145.62	151.88	202.28	202.28	308.21	308.21	380.76	382.63	490.31	490.31	0	0	0	0	0	0	0	0	202.86	202.86	273.18	283.19	294	296.38	339.28	345	403.02	406
BPm85	148.89	154.94	205.16	213.57	306.41	308	373.02	375.05	490	490	170.38	170.38	231.85	231.85	308	308	411	423	211.14	217.28	283.02	291.04	296.21	296.21	344.69	344.69	400	406
BPm86	145.66	166.52	205.07	213.53	304.11	308.39	382.55	382.55	489.53	489.53	168.4	172.44	228	231.77	310.04	310.04	411	420	205.44	209.32	273.08	291	292	302	344.7	344.7	403	403
BPm87	146.14	154.94	205.05	207.93	304.03	308.23	373.14	382.64	489.63	489.63	170.32	172.37	228.02	231.84	310.01	312.06	408	411	209	209	279.16	281.12	294.36	302.2	342	345.43	400	402.92
BPm88	148.81	152.4	202.24	205.09	308.18	308.18	371.1	373.02	490	490	168.49	172.49	239.5	239.5	310.1	310.1	420.02	423.15	205.37	220.72	279.07	281.11	300	302.2	344.75	344.75	399.84	406.13
BPf89	146.14	148.89	202.28	210.76	308.31	320	380.66	380.66	486.55	489.62	172	172	228.15	228.15	310.2	310.2	410.81	410.81	209.3	213.02	277.16	285.17	294	294	342	345.49	400	402.95
BPf90	148.82	166.53	202.3	210.72	304.12	308.4	378.79	382.5	487	496	166	172.4	231.88	244	307.99	310.03	399	417.18	209.17	220.81	277.14	281.15	294	296.33	344.58	344.58	406	406
BPf91	148.89	154.93	202.35	217	300	304.19	376.98	382.6	487	490	172.42	172.42	229.93	233.65	310.03	310.03	411	420.02	209.27	217	277.23	283	294.29	304	345.44	345.44	406	409.3
BPf92	148.9	154.93	202.25	202.25	304.27	308.44	373.14	375.06	490	490	168.43	172.44	228.02	228.02	308	310.04	410.98	416.97	205.4	213.01	279.18	283.1	294	294	339.4	344.66	402.9	409.23
BPf93	154.93	154.93	202.26	202.26	308.45	316	376.9	385	489.53	496	166	170	231.74	231.74	310.1	310.1	411	414	211	211	279.17	281.17	292.37	298	345	345	403.03	406.23
BPf94	154.89	154.89	202.35	213.58	308.28	308.28	371.2	385	490	490	172.35	176.18	231.89	244	310.05	310.05	408	423	209	209	279.18	281.19	292.39	298.43	345	345	396	403.06
BPf95	154.85	185	210.77	213.55	308.09	316	376.96	382.56	490	499	166	172.4	228.01	228.01	308.03	308.03	410.89	420.38	0	0	0	0	0	0	0	0	0	0
BPf96	154.9	154.9	202.25	202.25	308.29	308.29	375.04	375.04	490.4	490.4	166	172.37	235.61	244	310.08	310.08	423.06	423.06	203.49	209.2	275.16	285.25	300.17	304.27	344.62	344.62	406	406
BPf97	145.86	149	214	217	306.26	308.37	380.81	380.81	490	490	0	0	0	0	0	0	0	0	209	219	287.13	287.13	296	300	342	345	396	409.49
BPf98	154.93	154.93	202.36	202.36	308.3	308.3	378.87	380.78	490	496.25	0	0	0	0	0	0	0	0	209	215	285.12	287.19	292.35	296	344.7	344.7	392.99	403
BPf99	148.87	154.93	202.38	202.38	304.18	308.43	371.28	375.11	489.54	489.54	0	0	0	0	0	0	0	0	209	209	283.14	283.14	292.36	300	345	345	402.98	406.24
BPf100	154.88	154.88	205.11	210.66	304.02	308.22	373.14	380.76	487	490	166	174.32	235.75	235.75	305.96	310.16	420	422.99	209	217	283.12	295.08	290	292.35	344.58	344.58	406.33	409
BPf101	154.94	185	205.09	205.09	304	308.28	380.73	382.56	489.53	489.53	166	176.48	228.25	239.55	310.19	312.29	408	411	209	213	279.04	285.06	296.11	296.11	339	344.54	403.1	406.29
BPf102	143	154.84	202.28	210.79	308.38	308.38	375.15	378.9	487	496	0	0	0	0	0	0	0	0	213	213	281.13	283.16	294.27	302	345.45	345.45	403.08	415
BPf103	0	0	0	0	0	0	0	0	0	0	172.39	176.33	231.94	231.94	307.89	310.08	414	420.17	209	209	277.05	285.09	304	304	344.56	344.56	403	409.27
BPf104	148.79	154.92	205.24	205.24	308.42	308.42	382.59	382.59	487	490.49	172.48	174.36	232.07	232.07	310.18	312.29	408	423	0	0	0	0	0	0	0	0	0	0
BPf105	145.52	151.9	205.1	205.1	304.29	304.29	382.65	382.65	490	490	172	174.41	228.21	233.92	310.13	312.23	410.7	420	203	209	273.2	283.11	292.31	302	339.28	339.28	402.9	402.9
BPm106	148.88	154.89	210.63	214	299.92	308.25	373.05	382.54	487	487	172.47	182.15	228.26	232.1	314	314	414	414	213	219	277.18	279.17	292.37	296	342.3	345.36	402.96	415
BPm107	149.48	154.94	210.81	217	308.35	316	380.83	382.67	490	490	0	0	0	0	0	0	0	0	209	209	281.07	287.15	296	296	345	345	400	409.49
BPm108	146.13	154.93	210.58	213.53	304.07	304.07	375.01	378.85	0	0	174	176.3	228.21	228	310.22	310.22	405	416.99	217	219	281.11	285.08	292.32	298.15	345	345	403.08	403.08
BPm109	148.96	161.29	202	205.13	304.12	308.32	371.27	382.64	490	496	170	170	237.72	244	310.19	310.19	408	411	202.67	206.57	289.12	295.05	298.41	304	345.35	345.35	403	403
BPm110	143	154.94	210.71	210.71	304.16	308.31	373.14	382.58	487	487	171.61	174.37	228.2	231.96	307.88	310.06	414	423.04	209	215	277.14	285.06	294	294	345	345	399.91	406.32
BPm111	148.78	154.93	205.1	205.1	308.37	308.37	373.16	382.61	490	490	174.4	174.4	232.02	244	308.07	310.17	408	414	209	209	279.06	281.1	290.24	294	344.71	344.71	399.91	403
BPm112	0	0	0	0	0	0	0	0	0	0	172	174.34	232	236	308.16	310.17	414	423.04	209	215	285.08	285.08	292.32	302	339	345.36	403	403
BPm113	143	148.88	202.33	202.33	308.48	312	373.09	373.09	484	490	172	174	240	242.48	310.19	310.19	411	419.75	205	213	279.21	285.18	298.25	302	344.6	344.6	396	399.92
MDf114	0	0	0	0	0	0	0	0	0	0	170	172	226.29	228.24	310.17	310.17	417	417	209	209	281.13	281.13	298.26	306.37	345.43	345.43	400	406.1
MDf115	146	148.86	202.29	210.65	304.33	308.48	376.96	378.79	487	489.54	170	174.49	233.9	237.76	308.25	312	413.75	416.52	211	215	283.13	285.15	296	296	339	344.6	390	399.92
MDf116	154.89	154.89	210.67	210.67	308.42	312.48	373.2	377.03	490	496	170	172.48	228.22	232.1	310.21	310.21	408	408	211	215	281.16	283	292.34	298.24	345.39	345.39	400	406.13
MDf117	149.49	149.49	199	213.51	304.27	304.27	374.98	378.82	490	490	170	172	232.13	237.78	310.21	312.28	416.94	416.94	213	215	279.13	281.08	292.27	298	344.52	344.52	406.2	406.2
MDf118	145.61	154.9	204.97	213.51	308.32	308.32	375.02	384.53	487	490	0	0	0	0	0	0	0	0	211	215	279.14	283.21	292	292	344.55	344.55	399.83	403
MDf119	154.93	154.93	217	217	308.37	308.37	374.98	380.68	489.63	496	166	170	232.03	232.03	310.05	310.05	411	417	213	217	283.16	289.13	302	304	344.6	345	403.02	403.02
MDf120	154.85	157.94	207.93	210.68	304.21	308.41	378.8	389	490	496	168	172	228.31	233.99	312.29	312.29	408	408	0	0	275.26	275.26	298.32	298.32	339	348	400	400
MDf121	0	0	0	0	0	0	0	0	0	0	172	172	228.34	234.08	308.25	310.3	417	417	205	211	275.15	277.19	294.34	300	345	345	402.99	402.99
MDm122	0	0	0	0	0	0	0	0	0	0	168	170	232.12	232.12	310.31	314.42	411	419.71	213	215	283.13	283.13	292.36	296.4	344.66	344.66	399.83	402.99
MDm123	146.13	154.84	210.72	217	304.22	308.35	378.82	378.82	496.17	499	170	172	232.1	237.76	310.23	312.36	413.73	417	0	0	0	0	0	0	0	0	0	0
MDm124	146.2	154.89	205.11	205.11	306	306	375.08	380.86	490	490	0	0	0	0	0	0	0	0	0	0	279.16	281.09	292.35	294.29	344.58	344.58	393.1	411.58
MDm125	146	154.75	207.82	214	288	312	380.59	389	490	490	0	0	0	0	0	0	0	0	215	215	283.21	285.13	296	296	344.62	344.62	399.83	409
MDm126	142.77	146	210.65	213.51	308.41	312	374.9	389	490	490	170	170	228.23	233.83	308.1	310.16	417	420	215	215	275.15	283.12	296	300.27	344.6	344.6	399.91	403.07
MDm127	0	0	0	0	0	0	0	0	0	0	168	176.36	234	233.9	310	310	411	416.59	215	215	283.09	291.02	296	296	345	345	406	412
MDm128	146.13	148.78	202.36	210.74	308.4	308.4	376.9	380.68	489.53	496	170	170	233.79	237.59	308.07	310.16	420	420	204.61	215	279.08	283.05	296	296	344.55	344.55	406	406
MDm129	154.75	154.75	213.63	217	308.48	308.48	378.76	380.6	490	496	170	172	228.17	233.82	310.16	312.24	420.06	420.06	207	215	283.04	283.04	298.41	304	344.65	348	400	412.45
MDm130	0	0	0	0	0	0	0	0	0	0	0	0	0	0	0	0	0	0	0	0	0	0	0	0	0	0	0	0
MDf131	0	0	0	0	0	0	0	0	0	0	167.62	172	234	233.77	312	312	405	419.91	0	0	0	0	0	0	0	0	0	0
MDf132	146	151.78	202.33	202.33	308.49	308.49	372.99	374.81	447	490.3	0	0	0	0	0	0	0	0	205	213	283.1	285.12	292.3	294.22	345.48	345.48	402.98	402.98
MDf133	148.61	160.62	205.02	205.02	312	316	378.74	380.53	486.54	490	0	0	0	0	0	0	0	0	211	213	0	0	300.18	306	342	344.55	400	409
MDf134	0	0	0	0	0	0	0	0	0	0	172	172	226.23	237.54	310.18	312.15	417	417	209	215	285	287.19	292.37	296	344.52	344.52	402.88	409
MDf135	0	0	0	0	0	0	0	0	0	0	170	172	233.8	239.57	312	312	414	419.91	215	215	281.11	281.11	294	300.36	345	345	400	409
MDf136	0	0	0	0	0	0	0	0	0	0	170	170	231.94	240	310.11	310.11	417	420	0	0	0	0	0	0	0	0	0	0
MDf137	151.7	154.69	202.34	202.34	304.27	304.27	372.99	374.82	0	0	169.54	169.54	226.25	231.87	308.11	310.09	414	417	211	211	281.04	285.03	292.29	300	344.63	344.63	406.19	412.39
MDf138	149.2	151.78	199	199	304.41	312	380.66	389	0	0	170	174.46	239.56	239.56	305.88	312	405	417	215	215	281.18	281.18	292.4	300.36	344.65	344.65	400.09	409
MDf139	154.79	154.79	202.33	208.01	304	308	374.94	378.82	490	490	170	170	231.93	231.93	308.18	310.24	411	417	211	215	283.24	285.16	298	300	344.71	344.71	399.92	406

## Sheet: NoHWEdeviations
	Mix1								Mix2				Mix3
Sample	Nvesp_A	Nvesp_A	Nvesp_J	Nvesp_J	Nvesp_M	Nvesp_M	Nvesp_Q	Nvesp_Q	Nvesp_B	Nvesp_B	Nvesp_P	Nvesp_P	Nvesp_E	Nvesp_E	Nvesp_K	Nvesp_K	Nvesp_O	Nvesp_O
Wm1	149.39	154.9	308	312	372.95	378.75	487.48	490	170	178.35	417	419.97	213.12	217.09	345	345	409.21	409.21
Wm2	151.89	154.88	304.18	308.36	374.88	380.65	490	493	172.44	178.32	417	419.94	207	209.37	344.65	344.65	400	409.33
Wm3	158.31	158.31	304.01	304.01	374.96	374.96	490.31	490.31	172.45	172.45	417.04	417.04	211	217	339.36	344.55	392.95	406
Wm4	145.67	151.96	304.18	308.36	373.01	373.01	490	490	172	172	411	420.09	205.39	211.13	344.73	344.73	403	403
Wm5	146.27	154.99	304	308	372.93	380.58	490	490	172.44	172.44	410.98	417.21	215	215	345.49	345.49	399.83	402.93
Wm6	145.6	151.95	304.25	304.25	375.01	378.75	490	490	170	172	411	414	213	213	344.52	344.52	403	403
Wm7	154.98	160.8	304.14	308.37	378.77	380.6	490	490	172	172	399	413.9	202.7	211	344.56	344.56	389.78	403.05
Wm8	146.2	163.57	308.47	312	373.11	380.66	496	499	174	178.26	411	411	217	217	345	345	403.06	403.06
Wm9	140	154.9	299.91	308.39	373.02	380.56	490	499	170.4	170.4	411	417	205.33	209.28	345.26	345.26	403.08	406
Wm10	146.13	154.89	304.24	304.24	380.58	380.58	489.72	489.72	172.35	178.17	420.08	420.08	213	217	345.44	345.44	406.08	406.08
Wm11	152	155.03	303.86	316.39	372.92	374.87	490.31	490.31	168.44	172.33	417.19	417.19	211	213	344.63	344.63	393.09	406
Wm12	0	0	0	0	0	0	0	0	170.41	176.26	410.9	414.08	209.47	218.84	344.58	344.58	403.04	406.17
Wm13	145.76	154.93	0	0	372.89	378.55	490	493	170.48	172.37	417	417	217.03	217.03	345	345	403.04	403.04
Wm14	154.8	154.8	312	312	374.84	380.51	490.4	493	170	170	411	423.17	217	219	344.65	344.65	400	403.05
Wm15	149	154.98	304	312.28	374.92	378.75	487.48	487.48	168	172.31	411	417	206.59	217	345	345	0	0
Wm16	149.4	154.93	304	308	375.06	376.97	487	490	168	172	414	417	207	209.4	344.6	344.6	402.98	406
Wm17	145.63	154.94	304.27	304.27	375.06	378.83	490	493	170	172	414	420.29	213.05	213.05	344.6	344.6	403.09	406.26
Wm18	154.85	154.85	304	308	372.97	380.6	487.45	496	170.41	172.3	411	420.38	207	211.39	344.74	344.74	390	406.08
Wm19	151.97	160.73	303.89	303.89	380.73	380.73	490	490	172.25	172.25	414	417	211	211	344.6	348	389.76	399.92
Wm20	149	152.07	303.79	308.02	373	378.79	490	496	170.36	172	414	426	209.43	217.11	342.46	344.56	402.96	409.26
Wf21	145.73	154.94	303.88	308.03	378.67	380.63	446.84	490	170.38	170.38	411.03	414	209.43	211.27	345.41	345.41	403.14	406.37
Wf22	154.98	164.19	304.06	312.42	371.12	375.04	487	490.42	170	197.79	411	411	211	211	342	345	389.67	406.21
Wf23	139.72	179	308	312	374.88	374.88	484.33	496	172	182.09	411	420.15	211.35	211.35	344.5	348	403	406
Wf24	154.89	154.89	304.11	308	380.61	380.61	490	490	168	174	417.08	420.06	207	209	344.66	344.66	406	409
Wf25	149.39	149.39	308.35	324	375.1	384.54	490	496	170.44	176.12	408	411	207	211	344.71	344.71	402.93	402.93
Wf26	154.93	154.93	308.44	308.44	375.07	382.67	490	496	172.35	174	410.98	414.17	209.44	216.96	339.25	345	403.05	409.25
Wf27	146.27	154.93	304.17	304.17	380.67	380.67	490.4	490.4	170.35	178.22	414	423.34	211.38	213.04	345.34	345.34	402.87	406.1
Wf28	149.49	163.66	304	312	373.1	389	489.64	496	172.34	174	420.18	420.18	211.27	217.08	344.59	344.59	403.07	403.07
Wf29	149	155.03	303.79	308.12	374.92	376.8	490	496	170.41	172.32	414	414	216.99	216.99	344.53	344.53	396.01	403.06
Wf30	146.34	154.94	308	308	380.64	380.64	446.84	490	176.23	178.13	411	416.97	211.25	217.04	344.52	344.52	403.07	403.07
Wf31	0	0	0	0	0	0	0	0	170.4	170.4	414	416.96	207	213	345	345	389.69	403.11
Wf32	148.8	151.87	304.21	308.33	373.17	380.75	490	490	170.46	172.33	411	414	205	216.84	344.62	344.62	403.08	403.08
Wf33	146.2	151.96	304.23	304.23	378.82	389	490.49	490.49	170.42	170.42	410.9	423.3	211	211	345	348	403	412
Wf34	154.93	158.3	304	320	375.05	376.93	487	490	170.49	170.49	411.02	420.26	209.36	215.22	342.35	345.34	403.05	409
Wf35	154.89	154.89	304.17	308	373.07	380.66	487	496	170	172	411	417.26	211.23	213.16	344.6	344.6	389.55	406.25
Wf36	149.39	154.98	312.28	316.43	378.64	378.64	446.75	496	174	178.19	414.03	417.15	209.36	209.36	344.7	344.7	399.92	409.29
Wf37	146.24	151.99	303.99	324	382.6	385	490	490	170.43	170.43	411	414	207	211.28	345	345	406	409
Wf38	0	0	0	0	0	0	0	0	168	172.27	417	423.49	211	211	344.59	344.59	403.03	406.33
Wf39	152.07	154.94	299.91	308.27	374.99	389	490	490	170.47	172.37	411	414	213	219	339	345	406	409
Wf40	154.79	154.79	303.95	303.95	372.98	382.56	490	490	172.3	172.3	411	423.05	211.2	216.76	344.64	344.64	406	409
Gm41	149	154.98	308	308	375	378.8	490	490	170.32	170.32	411	414	209	209	339.27	345.43	402.95	402.95
Gm42	146.13	154.89	308.36	316	373.1	383	490	496	170.39	172.2	417	423.19	217	217	345	345	403	403
Gm43	0	0	0	0	0	0	0	0	170.38	172.28	411	423.19	217	217	345.39	345.39	403.11	403.11
Gm44	154.88	154.88	308.18	308.18	374.93	380.68	446.78	496	170.4	170.4	414.16	423.24	207	215.24	344.62	344.62	403.05	412
Gm45	149.39	151.88	304.28	304.28	373.08	382.56	489.54	496	170.31	170.31	423.18	423.18	211.29	217.02	345.47	345.47	403.08	403.08
Gm46	149.39	154.98	303.81	308.15	378.81	380.7	490	490	168.42	172.16	411	423	213.17	216.95	345.39	345.39	402.99	421
Gm47	155.03	160.73	303.97	312.45	374.96	378.79	490	490	172.3	178.19	411	426	211	211	339.36	344.51	402.99	412.44
Gm48	145.62	154.89	300.09	304	371.23	371.23	487	496	168.45	170	411	411	217	217	345.45	345.45	402.97	402.97
Gm49	0	0	0	0	0	0	0	0	172.25	172.25	411	420.04	0	0	0	0	0	0
Gm50	131	154.88	304.01	308.29	371.25	378.88	487.49	496	170.43	178	414	420.01	213	213	345.36	345.36	403.03	409.2
Gm51	151.96	154.9	300	308.42	374.98	376.86	490	490	168.39	170.39	411	414	209.48	213.34	348	348	399.92	406.2
Gm52	152.07	154.94	304.05	308.27	378.89	378.89	490	496	172.21	172.21	414	420	216.98	216.98	339.32	344.54	403	403
Gm53	152.44	157.85	308	316	380.62	380.62	490	490	164	172.43	417	417	217	217	345.36	345.36	403.04	403.04
Gm54	0	0	0	0	0	0	0	0	170.49	172.3	399	414.06	211.28	215.21	345	345	406.19	409.42
Gm55	151.98	154.85	304.21	308.41	373.1	382.63	0	0	170	182	408	420.02	217	217	344.53	344.53	403.01	406.1
Gm56	148.89	154.94	308.14	308.14	380.64	383	490	490	168	172	420	423.29	207	217	344.67	344.67	403.07	403.07
Gm57	148.88	151.9	304.05	308.28	378.8	380.67	490	490	170	172.39	411	420	207.38	215.02	339.34	344.67	403.03	409.18
Gm58	140	151.98	308	312	380.67	386.58	490	496	176.26	181.94	414.08	414.08	0	0	345.36	345.36	406	406
Gm59	151.88	154.94	0	0	0	0	490	490	170.38	172.47	414	420	207	217.04	345	348	403.04	406.27
Gm60	145.76	160.64	299.82	308.28	371.41	375.2	0	0	170.28	172.2	414	423.22	211	217	345	345	389.71	406
Gf61	149.4	154.88	308	308	375.07	378.85	490	490	170.32	170.32	407.85	414.16	207	213.13	345.41	345.41	389.75	403.14
Gf62	154.93	178.69	304.1	316	373.07	382.59	490	490	170.28	172.27	407.94	414	213.29	213.29	339.23	345	403.15	409
Gf63	154.94	154.94	304	308.33	378.85	378.85	490	490	170.34	172.41	408	411	205	211.3	344.57	354	406	406
Gf64	148.89	154.94	303.87	308	371.14	374.94	490	490	170.45	170.45	414	417	203	216.83	344.54	344.54	402.92	406
Gf65	154.98	154.98	304.07	316	373.14	374.93	490	496	170	172.44	407.76	411	213.17	216.95	345.42	345.42	400	406.19
Gf66	146.13	154.93	304.17	308.33	371.23	380.77	447	496	170	172	420	420	213	219	345.49	345.49	406	409.2
Gf67	140	160.64	304.13	304.13	373.12	378.87	447	489.62	172.35	172.35	414	417	211	217	345	345	403	409.37
Gf68	154.94	154.94	303.8	307.95	375.01	386.67	490	496	170.29	172.2	414.2	420.17	211.21	216.82	345	345	399.92	406
Gf69	145.55	157.8	300.09	308	373.11	380.7	469	490.41	174.44	174.44	411.02	411.02	213.15	225	342	345	396.09	406
Gf70	152.07	178.65	304	308.08	373.04	382.57	490	490	170.05	174	414.06	423.14	211.28	217.05	344.64	344.64	406	406
Gf71	145.58	154.93	308.3	308.3	376.93	380.75	0	0	174	176.33	413.52	413.52	211	213	339.26	345	402.99	402.99
Gf72	149.4	151.89	304.12	304.12	0	0	490	490	171.57	178	408	426.02	209	217	345.37	345.37	389.54	390
Gf73	154.89	154.89	304	312	375.03	376.97	490	490	170	176.27	423.08	423.08	211.12	220.68	345.4	345.4	406	412
Gf74	148.78	148.78	308	324	376.96	380.68	490	490	170.35	172.44	417	417	211.17	213.08	345.36	345.36	399.92	406
Gf75	154.84	154.84	304	304	378.96	380.93	0	0	172.35	172.35	417	417	0	0	342	345	400	421
Gf76	152.01	158.36	308.4	316	375.11	375.11	0	0	174	181.93	417.24	419.98	209.45	213.12	344.55	344.55	400	406
Gf77	151.99	160.73	303.87	303.87	382.6	382.6	490	490	172.32	172.32	417.15	423.16	211	217	342	342	406.36	409.42
Gf78	152.49	152.49	308.36	308.36	373.16	380.79	490	490	168	170.34	417	417	207	211	339.29	344.56	406.17	412
Gf79	148.88	154.89	304.2	304.2	378.8	380.69	490	490	170.41	176.18	420.08	420.08	0	0	0	0	0	0
Gf80	146.17	151.97	304.27	308	371.26	375.01	490	490	170.48	170.48	407.77	407.77	211	211	344.62	344.62	403.05	409.34
BPm81	139.51	154.84	308.33	316	380.68	382.6	490	490	168	170	408	414.05	209.15	209.15	344.5	344.5	400	406
BPm82	154.93	154.93	308.36	308.36	373.09	382.54	487	487	172.44	172.44	408	411	209.12	215.06	339	345	403	403
BPm83	149.4	154.89	0	0	374.67	379	490	490	170.35	172.42	411	417	211.05	217.35	344.54	344.54	403.01	406
BPm84	145.62	151.88	308.21	308.21	380.76	382.63	490.31	490.31	0	0	0	0	202.86	202.86	339.28	345	403.02	406
BPm85	148.89	154.94	306.41	308	373.02	375.05	490	490	170.38	170.38	411	423	211.14	217.28	344.69	344.69	400	406
BPm86	145.66	166.52	304.11	308.39	382.55	382.55	489.53	489.53	168.4	172.44	411	420	205.44	209.32	344.7	344.7	403	403
BPm87	146.14	154.94	304.03	308.23	373.14	382.64	489.63	489.63	170.32	172.37	408	411	209	209	342	345.43	400	402.92
BPm88	148.81	152.4	308.18	308.18	371.1	373.02	490	490	168.49	172.49	420.02	423.15	205.37	220.72	344.75	344.75	399.84	406.13
BPf89	146.14	148.89	308.31	320	380.66	380.66	486.55	489.62	172	172	410.81	410.81	209.3	213.02	342	345.49	400	402.95
BPf90	148.82	166.53	304.12	308.4	378.79	382.5	487	496	166	172.4	399	417.18	209.17	220.81	344.58	344.58	406	406
BPf91	148.89	154.93	300	304.19	376.98	382.6	487	490	172.42	172.42	411	420.02	209.27	217	345.44	345.44	406	409.3
BPf92	148.9	154.93	304.27	308.44	373.14	375.06	490	490	168.43	172.44	410.98	416.97	205.4	213.01	339.4	344.66	402.9	409.23
BPf93	154.93	154.93	308.45	316	376.9	385	489.53	496	166	170	411	414	211	211	345	345	403.03	406.23
BPf94	154.89	154.89	308.28	308.28	371.2	385	490	490	172.35	176.18	408	423	209	209	345	345	396	403.06
BPf95	154.85	185	308.09	316	376.96	382.56	490	499	166	172.4	410.89	420.38	0	0	0	0	0	0
BPf96	154.9	154.9	308.29	308.29	375.04	375.04	490.4	490.4	166	172.37	423.06	423.06	203.49	209.2	344.62	344.62	406	406
BPf97	145.86	149	306.26	308.37	380.81	380.81	490	490	0	0	0	0	209	219	342	345	396	409.49
BPf98	154.93	154.93	308.3	308.3	378.87	380.78	490	496.25	0	0	0	0	209	215	344.7	344.7	392.99	403
BPf99	148.87	154.93	304.18	308.43	371.28	375.11	489.54	489.54	0	0	0	0	209	209	345	345	402.98	406.24
BPf100	154.88	154.88	304.02	308.22	373.14	380.76	487	490	166	174.32	420	422.99	209	217	344.58	344.58	406.33	409
BPf101	154.94	185	304	308.28	380.73	382.56	489.53	489.53	166	176.48	408	411	209	213	339	344.54	403.1	406.29
BPf102	143	154.84	308.38	308.38	375.15	378.9	487	496	0	0	0	0	213	213	345.45	345.45	403.08	415
BPf103	0	0	0	0	0	0	0	0	172.39	176.33	414	420.17	209	209	344.56	344.56	403	409.27
BPf104	148.79	154.92	308.42	308.42	382.59	382.59	487	490.49	172.48	174.36	408	423	0	0	0	0	0	0
BPf105	145.52	151.9	304.29	304.29	382.65	382.65	490	490	172	174.41	410.7	420	203	209	339.28	339.28	402.9	402.9
BPm106	148.88	154.89	299.92	308.25	373.05	382.54	487	487	172.47	182.15	414	414	213	219	342.3	345.36	402.96	415
BPm107	149.48	154.94	308.35	316	380.83	382.67	490	490	0	0	0	0	209	209	345	345	400	409.49
BPm108	146.13	154.93	304.07	304.07	375.01	378.85	0	0	174	176.3	405	416.99	217	219	345	345	403.08	403.08
BPm109	148.96	161.29	304.12	308.32	371.27	382.64	490	496	170	170	408	411	202.67	206.57	345.35	345.35	403	403
BPm110	143	154.94	304.16	308.31	373.14	382.58	487	487	171.61	174.37	414	423.04	209	215	345	345	399.91	406.32
BPm111	148.78	154.93	308.37	308.37	373.16	382.61	490	490	174.4	174.4	408	414	209	209	344.71	344.71	399.91	403
BPm112	0	0	0	0	0	0	0	0	172	174.34	414	423.04	209	215	339	345.36	403	403
BPm113	143	148.88	308.48	312	373.09	373.09	484	490	172	174	411	419.75	205	213	344.6	344.6	396	399.92
MDf114	0	0	0	0	0	0	0	0	170	172	417	417	209	209	345.43	345.43	400	406.1
MDf115	146	148.86	304.33	308.48	376.96	378.79	487	489.54	170	174.49	413.75	416.52	211	215	339	344.6	390	399.92
MDf116	154.89	154.89	308.42	312.48	373.2	377.03	490	496	170	172.48	408	408	211	215	345.39	345.39	400	406.13
MDf117	149.49	149.49	304.27	304.27	374.98	378.82	490	490	170	172	416.94	416.94	213	215	344.52	344.52	406.2	406.2
MDf118	145.61	154.9	308.32	308.32	375.02	384.53	487	490	0	0	0	0	211	215	344.55	344.55	399.83	403
MDf119	154.93	154.93	308.37	308.37	374.98	380.68	489.63	496	166	170	411	417	213	217	344.6	345	403.02	403.02
MDf120	154.85	157.94	304.21	308.41	378.8	389	490	496	168	172	408	408	0	0	339	348	400	400
MDf121	0	0	0	0	0	0	0	0	172	172	417	417	205	211	345	345	402.99	402.99
MDm122	0	0	0	0	0	0	0	0	168	170	411	419.71	213	215	344.66	344.66	399.83	402.99
MDm123	146.13	154.84	304.22	308.35	378.82	378.82	496.17	499	170	172	413.73	417	0	0	0	0	0	0
MDm124	146.2	154.89	306	306	375.08	380.86	490	490	0	0	0	0	0	0	344.58	344.58	393.1	411.58
MDm125	146	154.75	288	312	380.59	389	490	490	0	0	0	0	215	215	344.62	344.62	399.83	409
MDm126	142.77	146	308.41	312	374.9	389	490	490	170	170	417	420	215	215	344.6	344.6	399.91	403.07
MDm127	0	0	0	0	0	0	0	0	168	176.36	411	416.59	215	215	345	345	406	412
MDm128	146.13	148.78	308.4	308.4	376.9	380.68	489.53	496	170	170	420	420	204.61	215	344.55	344.55	406	406
MDm129	154.75	154.75	308.48	308.48	378.76	380.6	490	496	170	172	420.06	420.06	207	215	344.65	348	400	412.45
MDm130	0	0	0	0	0	0	0	0	0	0	0	0	0	0	0	0	0	0
MDf131	0	0	0	0	0	0	0	0	167.62	172	405	419.91	0	0	0	0	0	0
MDf132	146	151.78	308.49	308.49	372.99	374.81	447	490.3	0	0	0	0	205	213	345.48	345.48	402.98	402.98
MDf133	148.61	160.62	312	316	378.74	380.53	486.54	490	0	0	0	0	211	213	342	344.55	400	409
MDf134	0	0	0	0	0	0	0	0	172	172	417	417	209	215	344.52	344.52	402.88	409
MDf135	0	0	0	0	0	0	0	0	170	172	414	419.91	215	215	345	345	400	409
MDf136	0	0	0	0	0	0	0	0	170	170	417	420	0	0	0	0	0	0
MDf137	151.7	154.69	304.27	304.27	372.99	374.82	0	0	169.54	169.54	414	417	211	211	344.63	344.63	406.19	412.39
MDf138	149.2	151.78	304.41	312	380.66	389	0	0	170	174.46	405	417	215	215	344.65	344.65	400.09	409
MDf139	154.79	154.79	304	308	374.94	378.82	490	490	170	170	411	417	211	215	344.71	344.71	399.92	406
